# Supplementary material
Source: HighWire-hosted journal article supplement (https://www.cmajopen.ca/highwire/filestream/81367/field_highwire_adjunct_files/0/2019-0084-1-at.pdf)

## Appendix 1 (as supplied by the authors): Supplemental tables and figures

Supplemental Table S1: Sensitivity analyses model inputs

|                                                                         | Base case                                   | Low estimate                                | High estimate                               |
|-------------------------------------------------------------------------|---------------------------------------------|---------------------------------------------|---------------------------------------------|
| <b>Disease prevalence</b>                                               |                                             |                                             |                                             |
| <b>Iron deficiency, general</b>                                         | 0.121                                       | 0.091                                       | 0.308                                       |
| Data Source                                                             | <12mg/L, from Target Kids! Unpublished data | Maguire et al., 2013                        | <18mg/L, from Target Kids! Unpublished data |
| <b>Iron deficiency, at-risk</b>                                         | 0.250                                       | 0.11                                        | 0.51                                        |
| Data Source                                                             | <12mg/L, from Target Kids! Unpublished data | <12mg/L, from Target Kids! Unpublished data | <18mg/L, from Target Kids! Unpublished data |
| <b>Probability of poor functional outcomes</b>                          |                                             |                                             |                                             |
| <b>Due to ID, untreated</b>                                             | 0.235                                       | 0.084                                       | 0.475                                       |
| Data Source                                                             | Lozoff et al., 2000                         | <18mg/L, from Target Kids! Unpublished data | Carroll & Downs, 2006*                      |
| <b>Not ID, untreated</b>                                                | 0.095                                       | 0.034                                       | 0.13                                        |
| Data Source                                                             | Idiradinata and Pollitt, 1993               | Simpson et al, 2003 <sup>†</sup>            | Rosenberg et al., 2008 <sup>‡</sup>         |
| <b>After iron supplement treatment, not ID</b>                          | 0.095                                       | 0                                           | 0.095                                       |
| Data Source                                                             | Idiradinata and Pollitt, 1993               | Expert opinion                              | Idiradinata and Pollitt, 1993               |
| <b>After iron supplement treatment, ID</b>                              | 0.095                                       | 0.05                                        | 0.235                                       |
| Data Source                                                             | Idiradinata and Pollitt, 1993               | Idiradinata and Pollitt, 1993               | Lozoff et al., 2000                         |
| <b>Proportion of at-risk children in the targeted screening program</b> |                                             |                                             |                                             |
| <b>Proportion of at-risk children</b>                                   | 0.355                                       | 0.085                                       | 0.42                                        |
| Data Source                                                             | OpTEC trial; 2 or more risk factors         | OpTEC Trial; 3 or more risk factors         | OpTEC Trial; 1 risk factor                  |
| <b>Test accuracy</b>                                                    |                                             |                                             |                                             |
| <b>Sensitivity</b>                                                      | 0.586                                       | 0.293                                       | 1                                           |
| Data Source                                                             | Guyatt et al., 1992                         | Base case * 0.5                             | -                                           |
| <b>Specificity</b>                                                      | 0.989                                       | 0.495                                       | 1                                           |
| Data Source                                                             | Guyatt et al., 1992                         | Base case * 0.5                             | -                                           |

| <b>Cost (\$)</b>                                         |                                                         |                                         |                                                         |
|----------------------------------------------------------|---------------------------------------------------------|-----------------------------------------|---------------------------------------------------------|
| <b>Total test cost, universal screening program</b>      | 28.48                                                   | 17.52                                   | 37.03                                                   |
| Data Source                                              | include CRP, Ferritin, and CBC; urban location          | w/o CBC or CRP; pick-up only            | base case * 1.3, to include the base case targeted cost |
| <b>Total test cost, targeted screening program</b>       | 35.00                                                   | 24.04                                   | 45.50                                                   |
| Data Source                                              | include CRP, Ferritin, and CBC; urban                   | w/o CBC or CRP; pick-up only            | base case * 1.3                                         |
| <b>Total treatment cost</b>                              | 170.00                                                  | 0                                       | 260.00                                                  |
| Data Source                                              | Prescription price (including dispensing fee): \$168.63 | Ontario Drug Benefit program            | Over-the-counter price (including tax): \$259.79        |
| <b>Patient-borne cost, universal screening program</b>   | 116.33                                                  | 6.5                                     | 219.54                                                  |
| Data Source                                              | Driving, 1/2 day off                                    | Using the TTC (roundtrip), no day off   | Driving, full-day off                                   |
| <b>Patient-borne cost, targeted screening program</b>    | 116.33                                                  | 4.55                                    | 285.40                                                  |
| Data Source                                              | same with base case universal screen                    | Low estimate for universal screen * 0.7 | High estimate for universal screen * 1.3                |
| <b>Utility measures</b>                                  |                                                         |                                         |                                                         |
| <b>Utility of living with poor functional outcomes</b>   | 0.84                                                    | 0.61                                    | 0.95                                                    |
| Data Source                                              | Ekman et al., 2007                                      | Ekman et al., 2007                      | Ekman et al., 2007                                      |
| <b>Utility of having iron supplementation (4-mo)</b>     | 0.815                                                   | 0.73                                    | 1                                                       |
| Data Source                                              | Considering utility loss by constipation, NICE 2010     | base case * 0.9                         | No change in life quality during the 4-month time       |
| <b>Discounting rate</b>                                  |                                                         |                                         |                                                         |
| <b>Discounting rate</b>                                  | 0.015                                                   | 0                                       | 0.05                                                    |
| Data Source                                              | CADTH                                                   | undiscounted                            | expert opinion                                          |
| <b>Remaining life expectancy after 18 months</b>         |                                                         |                                         |                                                         |
| <b>Remaining life expectancy after 18 months (years)</b> | 80.5                                                    | 68.8                                    | 83.1                                                    |
| Data Source                                              | Statistics Canada**                                     | Nunavut male life expectancy, 70.3      | BC female life expectancy, 84.6                         |

\*Carroll AE, Downs SM. Comprehensive cost-utility analysis of newborn screening strategies. *Pediatrics*. 2006;117(5 Pt 2):S287-95.

†Simpson GA, Colpe L, Greenspan S. Measuring functional developmental delay in infants and young children: prevalence rates from the NHIS-D. *Paediatric and perinatal epidemiology*. 2003;17(1):68-80.

‡Rosenberg SA, Zhang D, Robinson CC. Prevalence of developmental delays and participation in early intervention services for young children. *Pediatrics*. 2008;121(6):e1503-9.

\*\*Statistics Canada. Life tables, Canada, provinces and territories, catalogue no. 84-537-X. [https://www150.statcan.gc.ca/n1/pub/84-537-x/2018002/xls/2014-2016\\_Tbl-eng.xlsx](https://www150.statcan.gc.ca/n1/pub/84-537-x/2018002/xls/2014-2016_Tbl-eng.xlsx)

Appendix to: Carsley S, Fu R, Borkhoff CM, et al. Iron deficiency screening for children at 18 months: a cost-utility analysis. *CMAJ Open* 2019. DOI:10.9778/cmajo.20190084. Copyright © 2019 Joule Inc. or its licensors

Supplemental Table S2: Parameter Distributions for Probability Sensitivity Analyses

| <b>Parameter</b>                                              | <b>Variable Name</b>  | <b>Point Estimate</b> | <b>Probability Distribution</b> |
|---------------------------------------------------------------|-----------------------|-----------------------|---------------------------------|
| <b>Costs</b>                                                  |                       |                       |                                 |
| Cost of test, universal screen                                | CostTestUni           | 28.48                 | Gamma                           |
| Cost of test, targeted screen                                 | CostTestTar           | 35.00                 |                                 |
| Patient-borne, universal screen                               | CostPatientUni        | 116.33                |                                 |
| Patient-borne, targeted screen                                | CostPatientTar        | 116.33                |                                 |
| Cost of treatment                                             | CostTreat             | 170.00                |                                 |
| <b>Prevalence of ID</b>                                       |                       |                       |                                 |
| General population                                            | PrevGen               | 0.121                 | Beta                            |
| At-risk population                                            | PrevAtR               | 0.25                  |                                 |
| <b>Proportion of children included in the targeted screen</b> | PropAtR               | 0.355                 | Beta                            |
| <b>Probability of developing poor functional outcomes</b>     |                       |                       |                                 |
| Due to ID, untreated                                          | pPoorFunOut           | 0.235                 | Beta                            |
| Not due to ID, untreated                                      | pPoorFunOutNotID      | 0.095                 |                                 |
| Due to ID, treated                                            | pPoorFunOutIDTreat    | 0.095                 |                                 |
| Not due to ID, treated                                        | pPoorFunOutNotIDTreat | 0.095                 |                                 |
| <b>Test efficacy</b>                                          |                       |                       |                                 |
| Sensitivity                                                   | Sen                   | 0.586                 | Beta                            |
| Specificity                                                   | Spe                   | 0.989                 |                                 |
| <b>Utility</b>                                                |                       |                       |                                 |
| Living with poor functional outcomes                          | utilityPoorFunOut     | 0.84                  | Beta                            |
| Having iron supplementation treatment                         | utilityTreat          | 0.815                 |                                 |
| <b>Remaining life expectancy after 18 months</b>              | RemainLifeExp         | 80.5                  | Gamma                           |

Supplemental Tables S3-S5: One-way sensitivity analyses lowest and highest ICER values corresponding to Figure 3

**Universal vs. no screening:**

| <b>Variable name<br/>(range)</b>   | <b>Lowest ICER</b> | <b>Highest ICER</b> |
|------------------------------------|--------------------|---------------------|
| pPoorFunOutID<br>(0.084-0.475)     | 1003.41            | 11679.36            |
| pPoorFunOutIDTreat<br>(0.05-0.235) | 1845.53            | 8882.02             |
| Discount<br>(0-0.05)               | 957.28             | 5244.06             |
| utilityPoorFunOut<br>(0.61-0.95)   | 1101.63            | 4705.88             |
| CostPatientUni<br>(6.5-219.54)     | 745.56             | 3733.71             |
| Sen<br>(0.293-1)                   | 1449.20            | 4246.47             |
| PrevAtRisk<br>(0.11-0.51)          | 1567.76            | 3124.59             |
| PrevGen<br>(0.091-0.308)           | 1438.46            | 2547.31             |
| PropAtR<br>(0.085-0.42)            | 2190.33            | 2421.02             |
| CostTreat<br>(0-260)               | 2031.14            | 2421.02             |
| Spe<br>(0.495-1)                   | 1425.76            | 1685.98             |
| utilityTreat<br>(0.73-1)           | 2095.20            | 2385.92             |
| CostTestUni<br>(17.52-37.03)       | 2132.33            | 2405.98             |
| pPoorFunOutNotID<br>(0.034-0.13)   | 2246.79            | 2357.90             |
| pPoorFunOutNotIDTreat<br>(0-0.095) | 2182.91            | 2286.06             |
| RemainLifeExp<br>(68.8-83.1)       | 2285.06            | 2321.06             |
| CostTestTar<br>(24.04-45.5)        | 2286.06            | 2286.06             |
| CostPatientTar<br>(4.55-285.4)     | 2286.06            | 2286.06             |

**Targeted vs. no screening:**

| <b>Variable name<br/>(range)</b>   | <b>Lowest ICER</b> | <b>Highest ICER</b> |
|------------------------------------|--------------------|---------------------|
| pPoorFunOutID<br>(0.084-0.475)     | 732.44             | 8888.30             |
| pPoorFunOutIDTreat<br>(0.05-0.235) | 1361.51            | 6684.89             |
| Discount<br>(0-0.05)               | 695.26             | 3932.93             |
| utilityPoorFunOut<br>(0.61-0.95)   | 804.48             | 3484.03             |
| CostPatientTar<br>(4.55-285.4)     | 621.71             | 3273.01             |
| PrevAtRisk<br>(0.11-0.51)          | 948.15             | 3440.50             |
| Sen<br>(0.293-1)                   | 1085.96            | 3078.12             |
| CostTreat<br>(0-260)               | 1428.60            | 1808.42             |
| Spe<br>(0.495-1)                   | 1425.76            | 1685.98             |
| utilityTreat<br>(0.73-1)           | 1540.25            | 1748.23             |
| CostTestTar<br>(24.04-45.5)        | 1573.48            | 1776.07             |
| pPoorFunOutNotID<br>(0.034-0.13)   | 1659.37            | 1708.48             |
| pPoorFunOutNotIDTreat<br>(0-0.095) | 1630.27            | 1676.94             |
| RemainLifeExp<br>(68.8-83.1)       | 1676.53            | 1701.18             |
| PropAtR<br>(0.085-0.42)            | 1676.94            | 1676.94             |
| PrevGen<br>(0.091-0.308)           | 1676.94            | 1676.94             |
| CostTestUni<br>(17.52-37.03)       | 1676.94            | 1676.94             |
| CostPatientUni<br>(6.5-219.54)     | 1676.94            | 1676.94             |

### Universal vs. targeted screening

| <b>Variable name<br/>(range)</b>   | <b>Lowest ICER</b> | <b>Highest ICER</b> |
|------------------------------------|--------------------|---------------------|
| pPoorFunOutID<br>(0.084-0.475)     | 1309.03            | 14565.99            |
| pPoorFunOutIDTreat<br>(0.05-0.235) | 2398.95            | 11206.53            |
| CostPatientUni<br>(6.5-219.54)     | -294.07            | 6029.49             |
| Discount<br>(0-0.05)               | 1256.01            | 6641.33             |
| utilityPoorFunOut<br>(0.61-0.95)   | 1436.47            | 6043.47             |
| Sen<br>(0.293-1)                   | 1857.74            | 5527.59             |
| CostPatientTar<br>(4.55-285.4)     | 1184.42            | 4143.82             |
| PrevGen<br>(0.091-0.308)           | 1331.56            | 3824.07             |
| Spe<br>(0.495-1)                   | 1817.12            | 3029.61             |
| CostTestUni<br>(17.52-37.03)       | 2640.64            | 3219.74             |
| CostTreat<br>(0-260)               | 2703.71            | 3104.79             |
| utilityTreat<br>(0.73-1)           | 2711.82            | 3099.41             |
| CostTestTar<br>(24.04-45.5)        | 2855.32            | 3081.45             |
| pPoorFunOutNotID<br>(0.034-0.13)   | 2893.13            | 3102.05             |
| pPoorFunOutNotIDTreat<br>(0-0.095) | 2777.04            | 2965.96             |
| PropAtR<br>(0.085-0.42)            | 2944.27            | 3023.07             |
| RemainLifeExp<br>(68.8-83.1)       | 2964.04            | 3014.21             |
| PrevAtR<br>(0.11-0.51)             | 2965.96            | 2965.96             |

# Supplemental Figure S1: Decision Tree Model

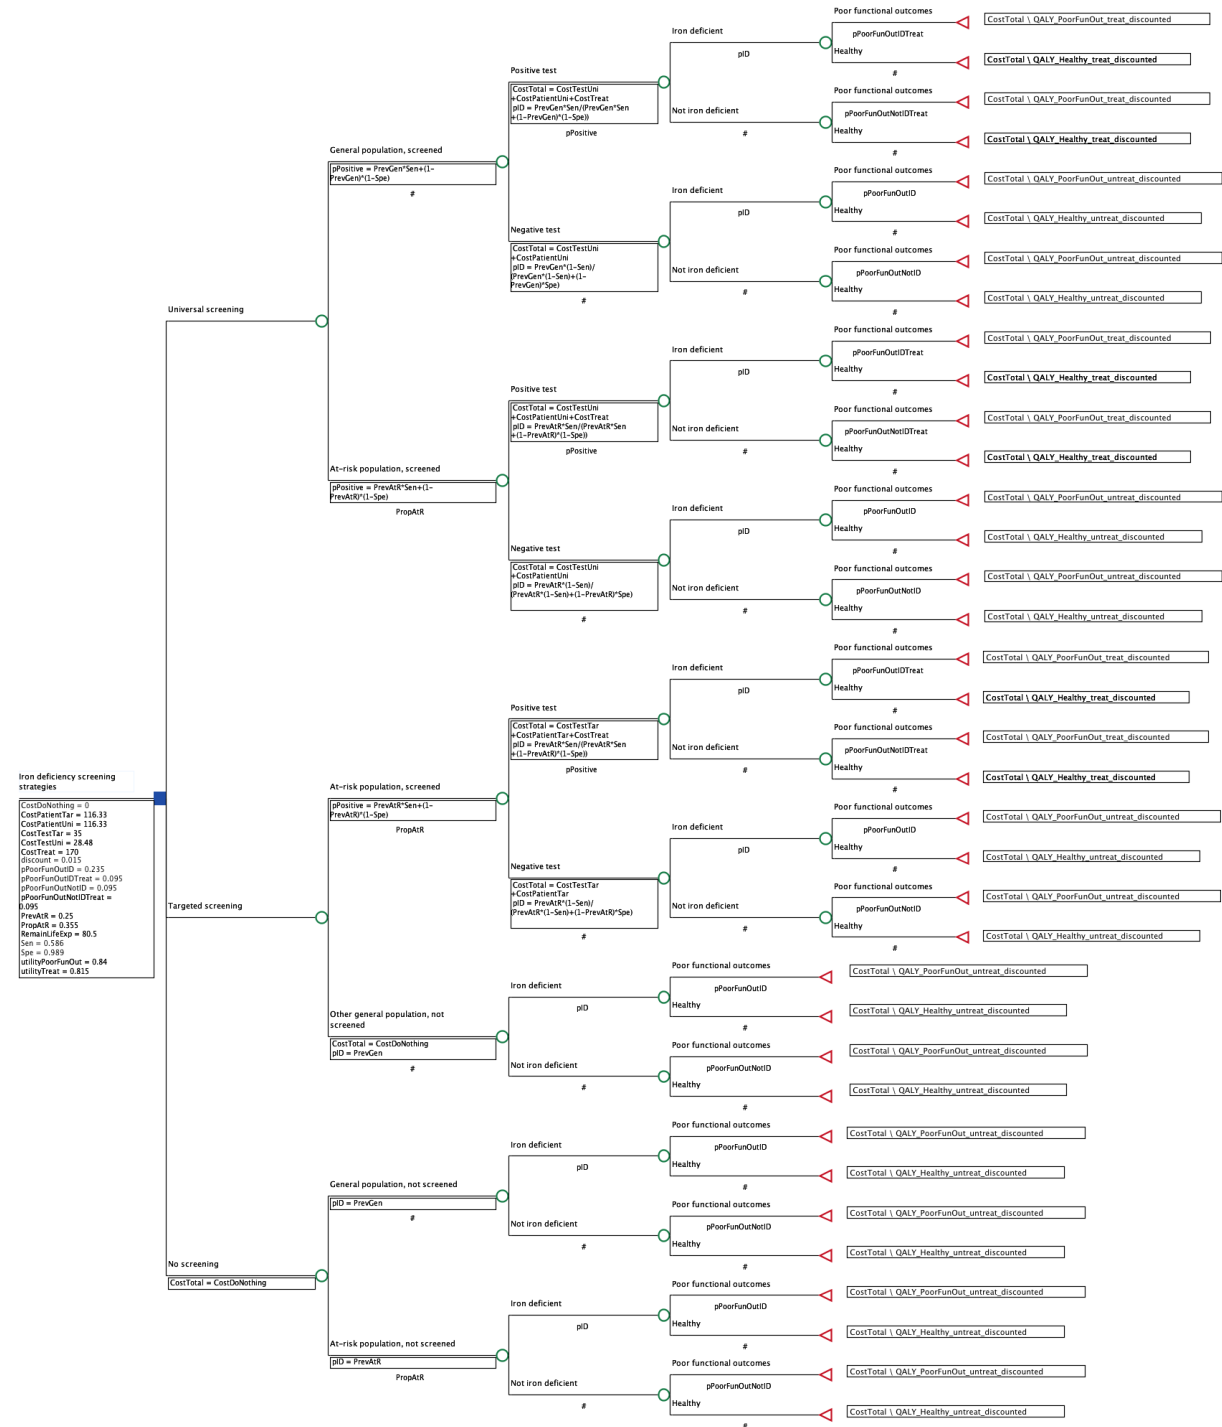

Supplemental Figure S2: Cost-Effectiveness Plane for Three Screening Strategies

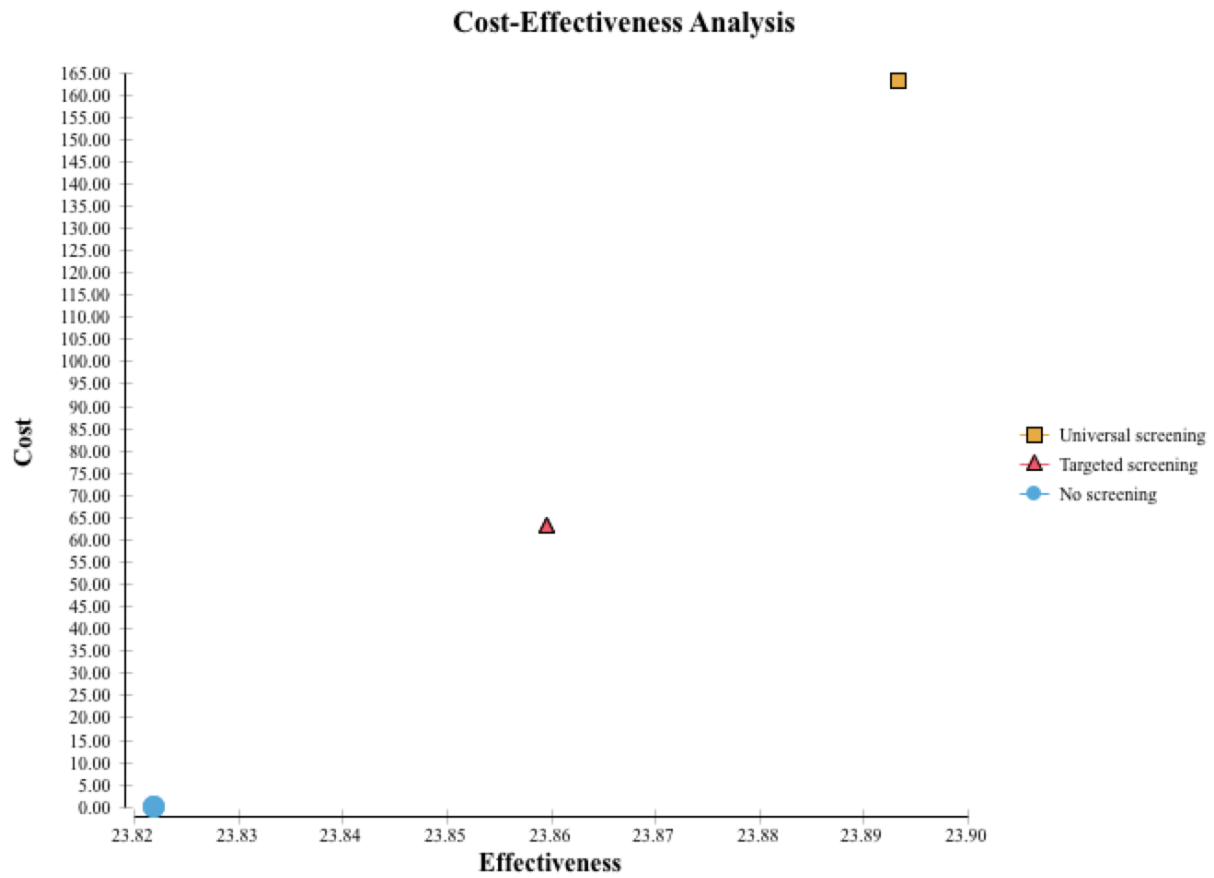

Supplement: 2019-0084-1-at.pdf [file 2019-0084-1-at.pdf]
